# Supplementary material for: High-resolution Hi-C maps highlight multiscale 3D epigenome reprogramming during pancreatic cancer metastasis
Source: Springer Nature journal article supplement (doi:10.1186/s13045-021-01131-0), 2021-08-04
Supplement: MOESM7 [file 19542568]

## Supplementary Materials

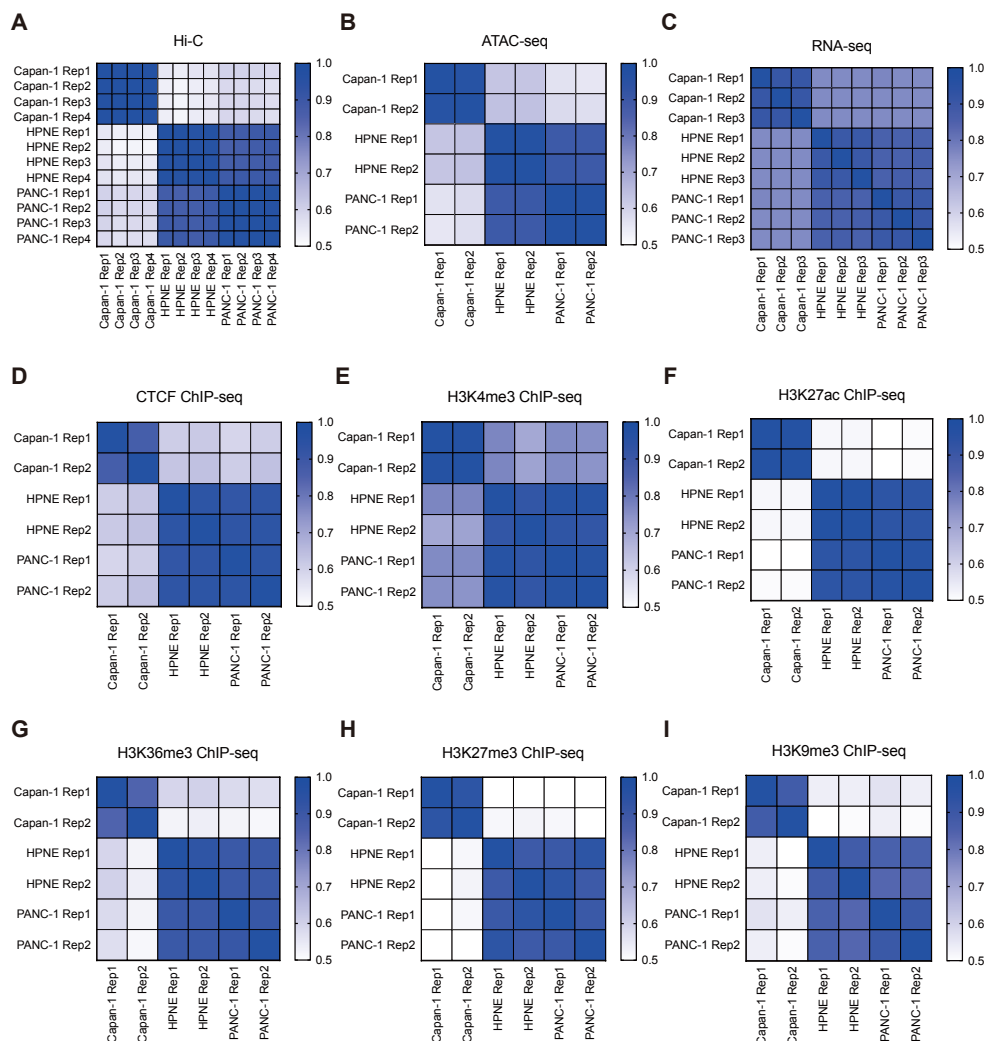

**Figure S1** Multi-omics comparative analysis of normal, primary and metastatic pancreatic cancer cells. (A-I) Correlation analysis of Hi-C, ATAC-seq, RNA-seq and ChIP-seq sequencing libraries of 3 cell lines. HPNE: normal pancreatic epithelial cells; PANC-1: pancreatic cancer cells derived from primary tumor; Capan-1: pancreatic cancer cells derived from liver metastasis.

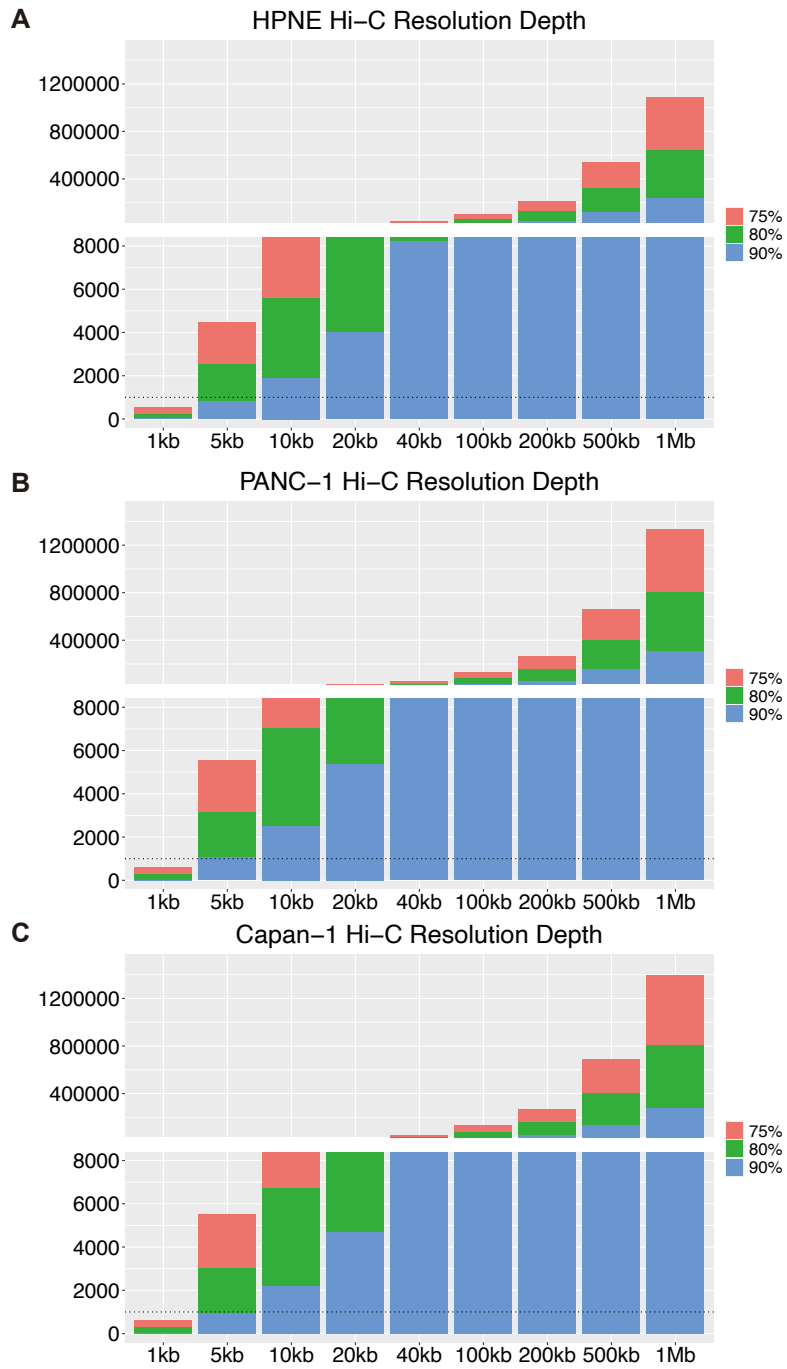

**Figure S2** Hi-C resolution depth of 3 cell lines. (A) HPNE (B) PANC-1 (C) Capan-1.

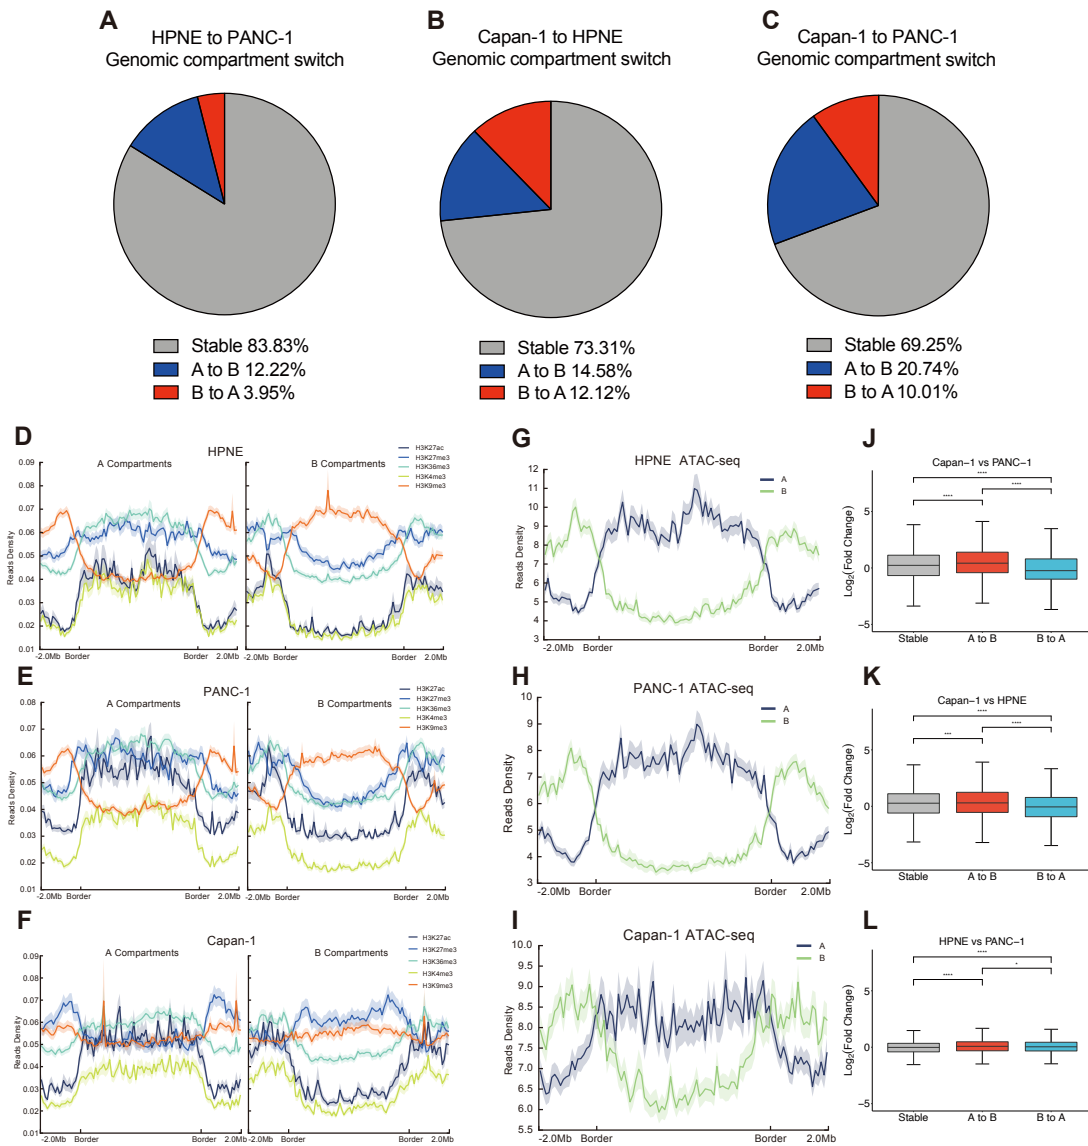

**Figure S3** Association between compartment reorganization, histone modifications, chromosome accessibility, and gene expression. (A) Pie chart showing the genomic compartment changes between HPNE and PANC-1 genomes. (B) Pie chart showing the genomic compartment changes between HPNE and Capan-1 genomes. (C) Pie chart showing the genomic compartment changes between PANC-1 and Capan-1 genomes. (D-F) Profiles of active and inactive histone modifications in A and B compartments of 3 cell lines. (G-I) Chromosome accessibility profile in A and B compartments of 3 cell lines. (J-L) Relationship of compartmentalization to gene expression ( $\text{Log}_2(\text{fold-change})$ ) in 3 cell lines (Wilcoxon rank sum test,  $*p < 0.05$ ,

\*\*\* $p < 0.001$ , \*\*\*\* $p < 0.0001$ ). Whiskers of box plots are from  $Q1 - 1.5 * IQR$  to  $Q3 + 1.5 * IQR$ .

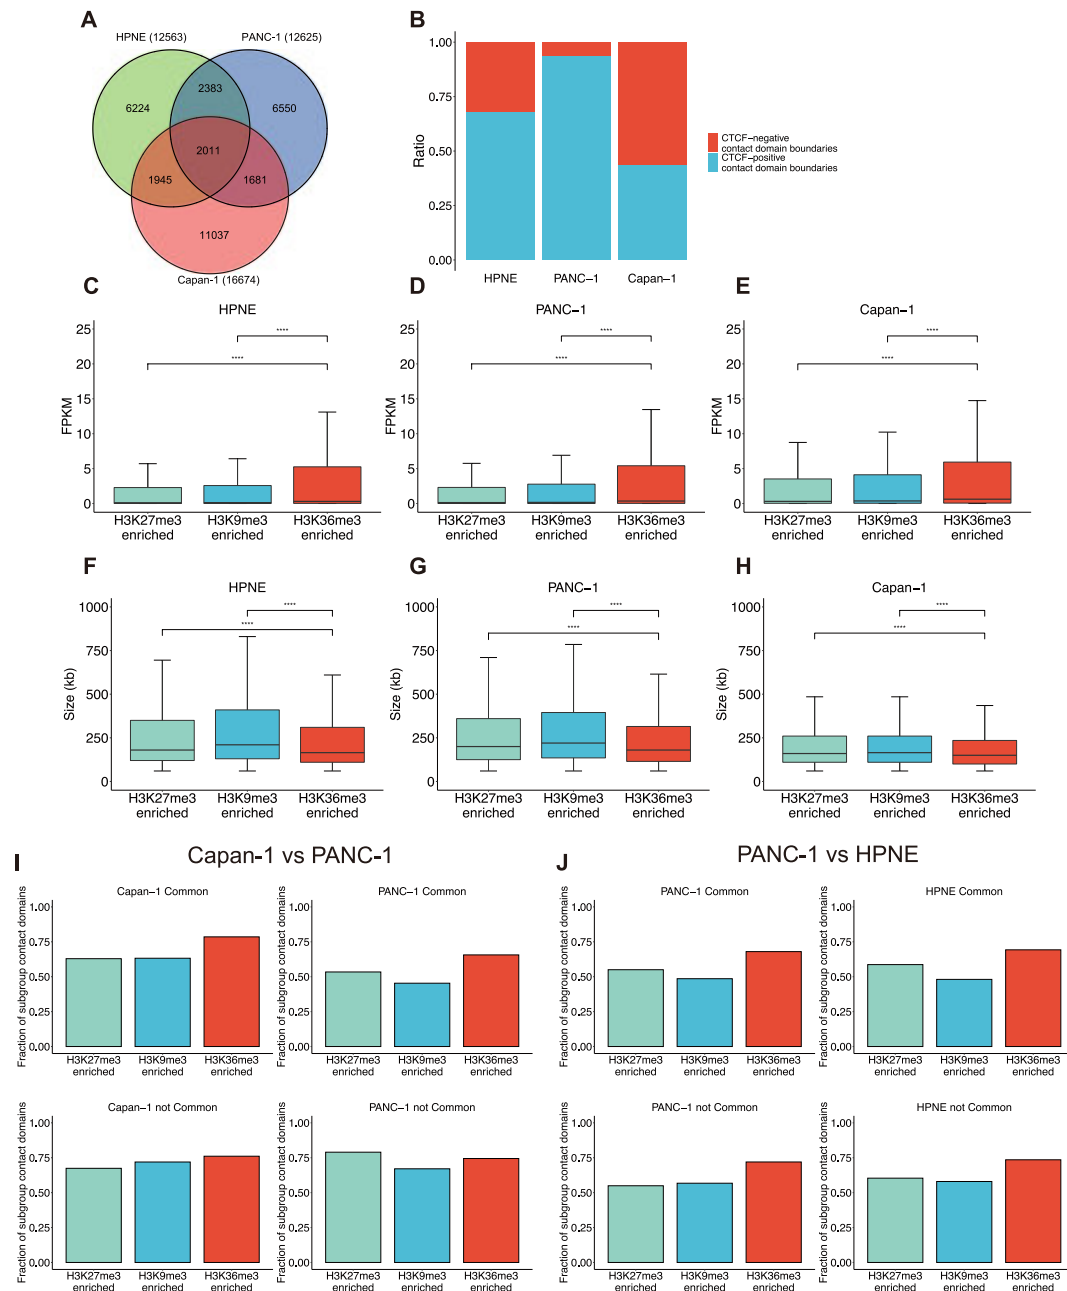

**Figure S4** Alterations of contact domains and contact domain boundaries during pancreatic cancer metastasis. (A) Venn diagram showing contact domain boundaries of 3 cell lines and the overlap among them. (B) The ratio of CTCF-positive/negative contact domain boundaries in 3 cell lines. (C-E) Average expression levels of genes located in each histone mark-enriched contact domains and contact domains without

histone modifications (other) across 3 cell lines (Wilcoxon rank sum test,  $**p < 0.01$ ,  $****p < 0.0001$ ). (F-H) Size of histone mark-enriched contact domains and other contact domains in 3 cell lines (Wilcoxon rank sum test,  $****p < 0.0001$ ). Whiskers of box plots are from  $Q1 - 1.5 * IQR$  to  $Q3 + 1.5 * IQR$ . (I) Upper: Fraction of histone mark-enriched TAD subgroups in common TADs between primary and metastasis. Lower: Fraction of histone mark-enriched TAD subgroups in specific TADs between primary and metastasis. (J) Upper: Fraction of histone mark-enriched TAD subgroups in common TADs between normal and primary. Lower: Fraction of histone mark-enriched TAD subgroups in specific TADs between normal and primary.

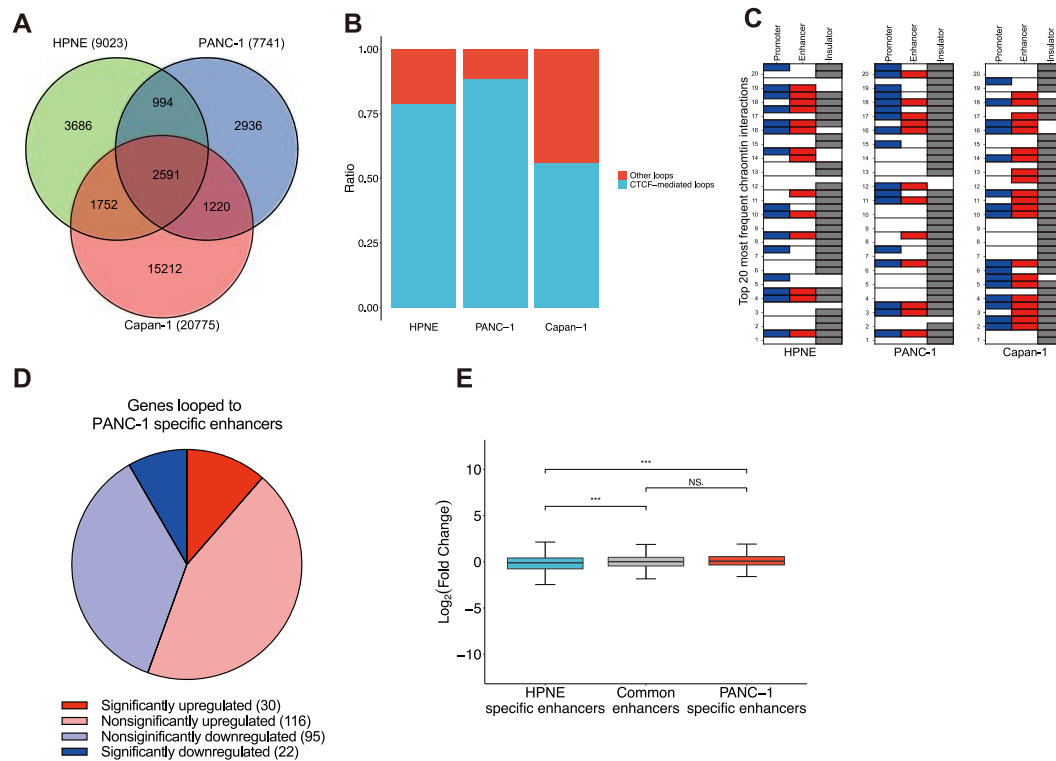

**Figure S5** Loop reprogramming during pancreatic cancer metastasis. (A) Venn diagram showing TAD loops of 3 cell lines and the overlap among them. (B) The ratio of CTCF-mediated loops in 3 cell lines. (C) Top 20 most frequent loop categories for HPNE, PANC-1 and Capan-1. For each loop, the regulatory element overlapped with anchor 1 is shown on the bottom half of the rectangle and the

regulatory element overlapped with anchor 2 is shown on the top half of the rectangle.

(D) Pie chart showing that genes looped to primary-specific enhancers enrich more upregulated genes. (E) Log<sub>2</sub>(fold change) between Capan-1 and PANC-1 cells of genes that looped to primary-specific, common, and metastasis-specific enhancers (Wilcoxon rank sum test, ns p>0.05, \*\*\*p<0.001, \*\*\*\*p<0.0001).

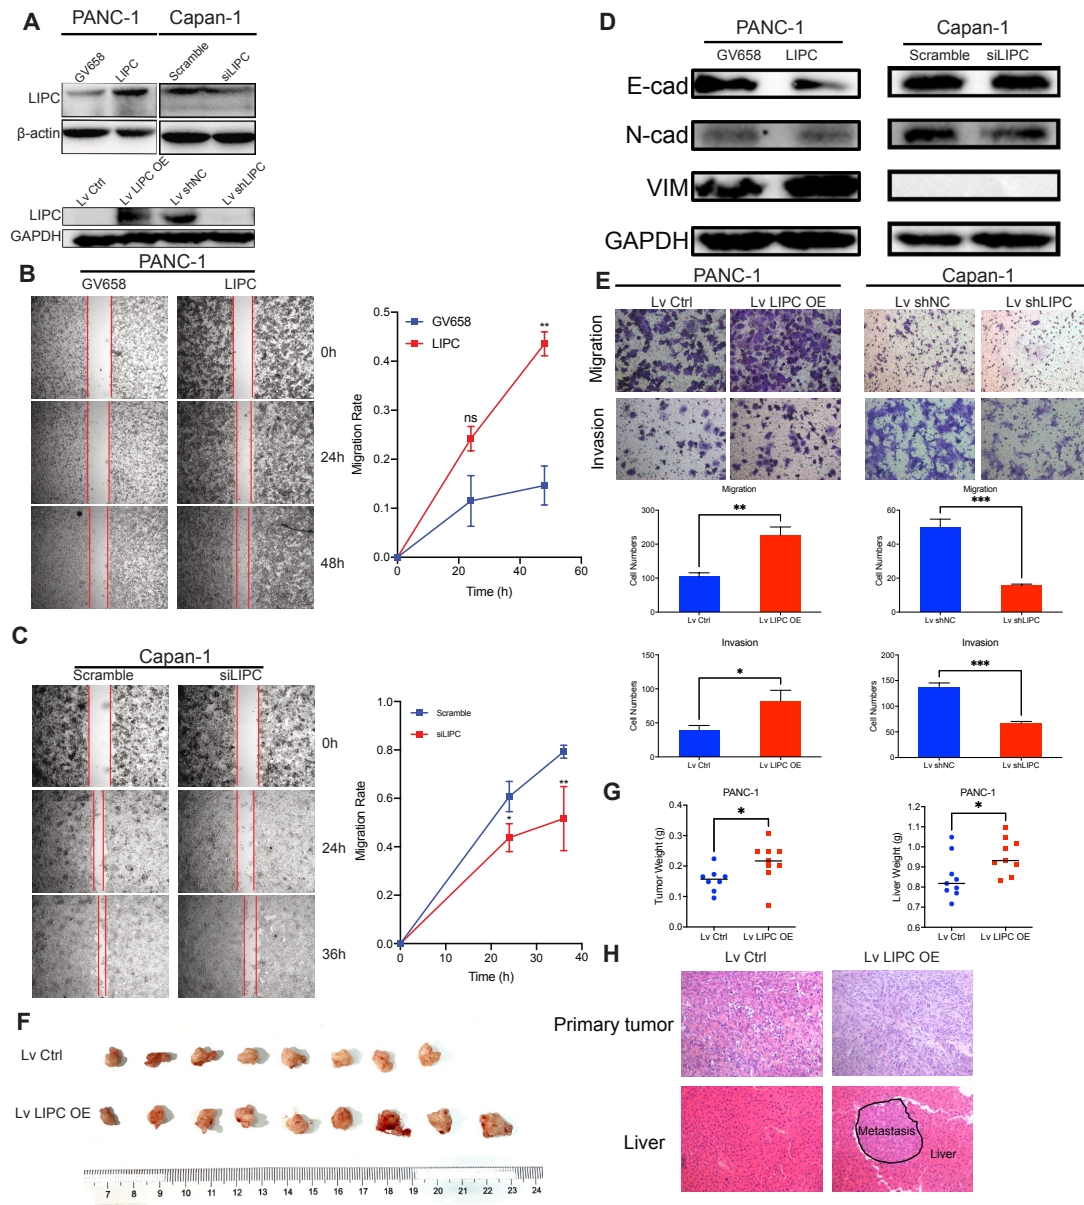

**Figure S6** LIPC promotes migration and EMT process of pancreatic cancer cells. (A) Western blot of LIPC in PANC-1 with LIPC overexpression and Capan-1 with LIPC knockdown. (B-C) Wound-healing assays in Capan-1 with LIPC knockdown and

PANC-1 with LIPC overexpression. Wounds were photographed, and the migration rate (n=3) was measured by ImageJ software (Whisker: mean  $\pm$  SEM, two-way ANOVA, \*adj.p<0.05, \*\*adj.p<0.01). (D) Western blot of EMT markers in PANC-1 with LIPC overexpression and Capan-1 with LIPC knockdown. (E) Transwell migration and invasion assay of PANC-1 with LIPC stably overexpression and Capan-1 with LIPC stably suppression. Representative images are shown. Magnification,  $\times 200$ . Cell number of migration/invasion are shown in the bottom panel (mean + SD) (Unpaired t test, migration: p = 0.0018, invasion: p = 0.0121(PANC-1); migration: p = 0.0003, invasion: p = 0.0002). (F) Photographs of dissected tumors from orthotopic xenograft mice injected with Lv Ctrl and Lv LIPC OE (overexpression) PANC-1 cells. (G) Analysis of primary tumor weights(Left, Wilcoxon rank sum test, p = 0.0206) and liver weights (Right, Wilcoxon rank sum test, p = 0.0244) were calculated at the end of the experiment. (H) Representative HE staining pictures of the primary tumor and liver. (Magnification,  $\times 200$ ).

**Table S1** Clinicopathological features of patients with primary pancreatic cancer.

| Clinicopathological features |                  |
|------------------------------|------------------|
| Number of cases              | 87               |
| LIPC IHC Score (mean (SD))   | 83.56 (27.91)    |
| Gender (%)                   |                  |
| Female                       | 33 (37.9)        |
| Male                         | 54 (62.1)        |
| Age (mean (SD))              | 60.83 (9.36)     |
| Smoking history (%)          | 34 (39.1)        |
| Drinking history (%)         | 19 (21.8)        |
| Diabetes history (%)         | 13 (14.9)        |
| CA199 (mean (SD))            | 937.05 (2219.53) |

|                        |             |
|------------------------|-------------|
| Size (mean (SD))       | 3.43 (1.53) |
| Site (%)               |             |
| Head/Neck              | 48 (55.8)   |
| Body/Tail              | 39 (44.2)   |
| Differentiation (%)    |             |
| Poor                   | 29 (37.1)   |
| Moderate               | 22 (28.2)   |
| Well                   | 27 (34.6)   |
| Capsule invasion (%)   | 80 (96.4)   |
| Vascular invasion (%)  | 4 ( 6.5)    |
| Bile duct invasion (%) | 28 (45.9)   |
| Neural invasion (%)    | 17 (27.4)   |
| T classification (%)   |             |
| T1                     | 16 (20.3)   |
| T2                     | 47 (59.5)   |
| T3                     | 16 (20.3)   |
| N classification (%)   |             |
| N0                     | 44 (50.6)   |
| N1                     | 43 (49.4)   |

**Table S2** Clinicopathological features of pancreatic cancer patients with liver metastasis

|                              |                |
|------------------------------|----------------|
| Clinicopathological features |                |
| Number of cases              | 27             |
| LIPC IHC Score (mean (SD))   | 126.30 (48.01) |
| Gender (%)                   |                |
| Female                       | 14 (51.9)      |
| Male                         | 13 (48.1)      |
| Age (mean (SD))              | 63.26 (9.15)   |
| Smoking history              | 7 (25.9)       |
| Drinking history             | 4 (14.8)       |



|                                                 |                   |
|-------------------------------------------------|-------------------|
| Diabetes history                                | 4 (14.8)          |
| CA199 (mean (SD))                               | 1141.84 (1644.92) |
| Site                                            |                   |
| Head/Neck                                       | 19 (70.4)         |
| Body/Tail                                       | 8 (29.6)          |
| Vascular invasion <sup>1</sup> (%)              | 10 (37.0)         |
| Size of primary cancer <sup>1</sup> (mean (SD)) | 3.14 (1.28)       |

1. Vascular invasion and size of the primary cancer were measured by preoperative CT scanning

**Table S3** Primers for ChIP-qPCR

| Location        | Forward primer        | Reverse primer         |
|-----------------|-----------------------|------------------------|
| LIPC promoter   | CTGCAGCTAGCAGTGAAGTCT | CCCCGGTTGCAAATTAGATGC  |
| LIPC enhancer 1 | CCTTCGGTGTGAGTCTTTGC  | TGCAACTTCACCAGCCTCTAT  |
| LIPC enhancer 2 | AGCAGCTGCCAAATTGGATGA | CTGTTCCCACTCCCTACCTC   |
| LIPC enhancer 3 | CACAGGAACGTGTTGCAAGG  | TAGGGAGACAGTAGGAGCCG   |
| LIPC enhancer 4 | TGACATGGGCTGGGTGTTAT  | TTCCCTGAGTTCTCCCACAC   |
| LIPC enhancer 5 | ACGAGTACACGCTATGGCAG  | AGGGCTTGAGTGCCATATTT   |
| LIPC enhancer 6 | GACTTCGCTTCTCTGGGAGG  | CTCCCCGCTCCCTATTGTC    |
| LIPC enhancer 7 | CGCGGGTTTGACTTGAAGG   | GTCACCTTGTA CTGCCCTCTC |

**Table S4** Primers for 3C-qPCR

| Location                 | Primer               |
|--------------------------|----------------------|
| LIPC promoter (constant) | AGTGCAGAGGCTGAGAAACC |
| LIPC enhancer 1          | CCCAAGAGGTGAAAATTTGG |
| LIPC enhancer 2          | CAGGGATGAAAAGGCAGAAA |
| LIPC enhancer 3          | AAACAGAGGAAGCCCTACCC |

|                            |                        |
|----------------------------|------------------------|
| LIPC enhancer 4            | ACACTGTTCTGGGTGTGTGG   |
| LIPC enhancer 5            | GCAAAGTGATATTCAGCCACAA |
| LIPC enhancer 6            | AGGCACACCTTGAGGTTTTT   |
| LIPC enhancer 7            | GGA CTCAGAGCGAGTTACCTG |
| Negative control (Forward) | CGGGAGAAGCTGAGTCATGG   |
| Negative control (Reverse) | TTTACAGCCTGGCCTTTGGG   |

**Table S5** sgRNA for CRISPRi

| Location | sgRNA                 |
|----------|-----------------------|
| sgEnh1   | ACAGCAAAGACTCACACCGA  |
| sgEnh2   | GCCGGCTTTAATGCCCGCGT  |
| sgEnh3   | TCGGTGGCCAGAAATTCTCG  |
| sgEnh4   | GGGGAATTAGCATAACGGCCC |
| sgEnh5   | AGCCATACGAGTACACGCTA  |
| sgEnh6   | AGAGTAGAAGTTCGGTCCCT  |
| sgEnh7   | TTGGGTACCGCCGGAGACGC  |
| sgPro    | GTCAGGAGCTAGTAACGCTA  |
